# Supplementary material for: An Integrated Analytical Approach Reveals Trichome Acylsugar Metabolite Diversity in the Wild Tomato <em>Solanum Pennellii</em>
Source: Preprints.org preprint supplement (doi:10.20944/preprints202008.0702.v1), 2020-08-31
Supplement: Supplementary file 1 [file supp2.xlsx]

## Sheet: Sheet1
															Normalised abundance
															LA2560						LA2657						LA1773						LA1693						LA1340						LA0716
Compound	Neutral mass (Da)	m/z	Charge	Retention time (min)	Chromatographic peak width (min)	Identifications	Anova (p)	q Value	Max Fold Change	Highest Mean	Lowest Mean	Isotope Distribution	Maximum Abundance	Minimum CV%	XS2_20200228_005	XS2_20200228_039	XS2_20200228_078	XS2_20200228_093	XS2_20200228_119	XS2_20200302_008	XS2_20200228_007	XS2_20200228_124	XS2_20200302_013	XS2_20200302_014	XS2_20200302_019	XS2_20200302_026	XS2_20200228_009	XS2_20200228_032	XS2_20200228_105	XS2_20200228_122	XS2_20200228_141	XS2_20200302_039	XS2_20200228_012	XS2_20200228_066	XS2_20200228_087	XS2_20200228_116	XS2_20200228_147	XS2_20200302_010	XS2_20200228_014	XS2_20200228_025	XS2_20200228_051	XS2_20200228_069	XS2_20200228_074	XS2_20200302_047	XS2_20200228_016	XS2_20200228_096	XS2_20200228_109	XS2_20200228_128	XS2_20200302_012
4.90_329.1018m/z		329.102	1	4.89758	1.34442	0	0	0	Infinity	LA1941	LA2963	100 - 12.7 - 0.884	2619.91	34.92	0.481538	1.24549	2.45308	16.1714	0.84454	1.01625	0.473441	0	0	0	0	0	8.28953	126.851	10.939	80.4079	15.1637	0	61.9861	0	107.632	28.6502	64.4035	171.365	193.745	78.5624	49.6871	123.226	70.486	108.92	183.225	176.657	392.032	432.6	310.19
2.34_566.2584n	566.258	584.293	1	2.34033	0.280317	0	0	0	Infinity	LA2963	LA2657	100 - 26.8 - 5.19 - 0.598 - 0.0573	1583.5	29.38	0	0	1.23888	0	0	0	0	0	0	0	0	0	0	0	0.30445	0	0	0	17.0176	7.8825	11.9274	15.4172	12.6947	19.5828	1.55264	8.78211	1.13677	2.69759	0.46989	12.1956	0.336083	0.0505333	0	0.183656	0
5.71_636.3360n	636.336	654.37	1	5.70998	0.246	0	0	0	Infinity	LA1693	LA2560	100 - 30.5 - 5.97 - 0.729 - 0.0594	1265.39	9.21	0	0	0	0	0	0	0	0	0	0	0	0	0	0	0	3.36784	0	0	768.354	1825.56	1399.04	2101.82	1031.6	465.935	598.269	804.013	230.414	384.656	244.74	881.358	26.2759	22.3175	21.8978	21.667	20.5762
3.44_608.3054n	608.305	626.339	1	3.43875	0.280317	0	0	0	Infinity	LA1657	LA1693	100 - 23.1 - 3.32 - 0.288	946.319	26.81	5.5043	35.4117	28.0605	17.0507	11.513	30.0825	13.1103	20.522	11.1603	11.9725	11.2258	9.42065	48.2223	49.765	72.8346	1.23993	17.049	17.6439	0	0	0	0	0	0	0	0	0	0	0	0	0	0	0	0.111317	0
3.67_608.3049n	608.305	626.339	1	3.66758	0.348967	0	0	0	Infinity	LA1656	LA2657	100 - 22.6 - 3.12 - 0.11	716.211	56.62	0	0	9.28023	0	0	0	0	0	0	0	0	0	0	0	0	167.978	0	0	53.5121	120.317	188.534	26.3119	474.132	639.538	0	47.1648	0.233749	145.013	0	48.7944	0	0	0	0	0
3.04_315.0864m/z		315.086	1	3.03828	0.463383	0	0	0	Infinity	LA1941	LA2963	100 - 11.4 - 0.75	526.597	19.41	49.7449	89.2597	192.508	146.376	22.9805	74.6635	97.9016	30.3961	80.9635	79.2743	91.5361	45.3584	221.982	73.2605	325.048	247.817	235.27	130.688	23.2323	24.8173	40.1154	218.938	17.4996	61.96	81.9829	63.7186	94.9781	41.8086	120.57	71.4551	173.161	136.829	239.152	204.178	203.122
2.21_552.2440n	552.244	570.278	1	2.20875	0.1659	0	0	0	Infinity	LA2963	LA2560	100 - 25.9 - 4.95 - 0.594 - 0.0449	503.695	13.62	0	0	0	0	0	0	0.00069021	0	0	0	0	0	0	0	0	0	0	0	5.40823	2.31913	4.6879	2.27955	5.69604	7.32689	0	0	0.279737	0.721524	0	1.37091	0	0	0	0	0
4.43_622.3201n	622.32	640.354	1	4.4342	0.497717	0	0	0	Infinity	LA1657	LA2657	100 - 22.9 - 2.21 - 0.0446	424.345	48.46	0	2.03203	0.368072	0	0	1.6727	0	0	0	0	0	0	0.560753	0.456767	0	97.8128	0	0	64.2148	130.949	113.735	77.5328	157.597	239.084	7.43212	103.058	3.44303	122.096	5.12132	103.729	0	0	0	0	0
2.59_580.2735n	580.273	598.308	1	2.59205	0.31465	0	0	0	Infinity	LA2963	LA2657	100 - 21.3 - 3.13 - 0.233	293.313	75.17	0	0	3.81208	0	0	1.53	0	0	0	0	0	0	2.5313	0.98535	0.478366	0	0	0	0.86496	0	1.63534	0.957	0.932807	2.60551	0	0.899163	0	0	0	0.54394	0	0	0	0	0
4.23_622.3205n	622.32	640.354	1	4.23393	0.44625	0	0	0	65424.7	LA1656	LA0716	100 - 24 - 3.38 - 0.177	1063.7	47.09	0	3.88807	2.2552	0.992792	0	1.95752	0.793947	0.788541	0.6817	0	0	0	5.4106	3.55061	10.7608	267.13	0.990358	0.75297	60.5372	134.103	174.845	59.6945	400.964	678.475	5.61899	154.569	3.7441	418.061	4.8615	156.091	0	0	0	0.0975501	0
3.00_594.2890n	594.289	612.323	1	3.00397	0.303217	0	0	0	58598.6	LA1657	LA0716	100 - 24.5 - 3.51 - 0.316	2011.51	35.2	16.8126	102.759	64.7816	36.8543	52.779	136.855	33.4624	65.9378	50.4538	36.0536	57.6431	24.9894	214.032	170.702	150.184	30.545	36.4725	81.0873	0.547971	0	0	0	0.0319109	0	0	0	0	0	0	0.955037	0	0	0	0.205962	0
6.04_446.2519n	446.252	464.286	1	6.04178	0.297483	0	0	0	53078.5	LA1674	LA1523	100 - 20.7 - 2.76 - 0.238	4261.91	17.6	3.28126	0.95973	0	0	0	0.399096	5.33748	0	0.581911	0.403224	0.501382	0	2.45341	1.31814	0	761.408	0	0.542904	93.4457	508.991	476.939	115.62	629.727	1099.97	62.6654	333.199	83.0273	2182.09	86.3087	392.468	34.3214	27.9748	26.9271	40.6084	26.7308
5.82_446.2523n	446.252	464.286	1	5.82438	0.251717	0	0	0	48491.9	LA1656	LA1523	100 - 26.6 - 4.69 - 0.554 - 0.0423	29573.7	29.62	4.32094	6.87178	2.11373	3.41624	0.196568	5.23854	4.5445	0	0.321067	0	0.371862	0	5.02999	4.57034	3.02348	4158.08	2.59373	0	795.569	1903.55	3781.61	488.983	8917.4	12604.5	110.528	1096.39	226.518	11562.8	201.31	1324.81	54.329	54.325	74.1396	140.907	76.2815
2.84_390.1897n	390.19	408.224	1	2.83805	0.303217	0	0	0	40613.6	LA1693	LA2657	100 - 18.2 - 2.48 - 0.227 - 0.00437	20474.6	18.3	15.0751	0.668397	0.611907	57.5128	1.68928	0.238071	0.816816	0.285486	1.01873	0.00576872	0.274304	0.623682	8.26233	1.08146	0.242764	2863.54	4.33018	1.74634	23843.6	10185.5	22204.2	14463.3	25437	26713.9	5617.97	7846.85	9349.8	6864.14	6247.71	8890.92	6102.05	6429.63	10318.9	12948.6	10530.1
8.20_664.3671n	664.367	682.401	1	8.19857	0.246	0	0	0	23230.3	LA2963	LA2719	100 - 28.1 - 5.01 - 0.528 - 0.00396	5029.59	14.62	0.796967	1.16183	2.74251	0.262276	0	1.64789	0	3.67868	0	1.6703	0	0	10.4823	1.3819	0	0	0	0	229.571	361.184	420.304	587.879	340.031	263.708	194.921	340.138	109.929	124.563	110.377	387.544	18.892	21.9778	18.5779	17.8658	15.8905
3.54_432.2005n	432.2	450.234	1	3.53598	0.228833	0	0	0	15482.1	LA1674	LA2657	100 - 17.1 - 2.65 - 0.188	889.193	57.01	0.271487	0.0177813	0.0114968	8.18374	3.97032	0.171282	0.344602	0	0	0	0	0	1.54072	0.00420488	0	0	0.14319	0	13.7146	1.32061	11.0075	1.59572	1271.85	1819.64	1.87817	1.2449	4.35898	0.394056	0.971858	0.877396	0.897738	0.214337	0.68953	2.1316	0.984816
10.26_692.3980n	692.398	710.432	1	10.2581	1.08127	0	0	0	12004.8	LA2657	LA0716	100 - 35.9 - 7.69 - 1.11 - 0.125 - 0.00306	35785	23.32	28725.7	25405.1	37327	26597	46163	26663.7	24792.1	35160.3	35539.7	30804.1	38720.8	49692.7	26117.1	30700.8	27555.2	12451.2	21505.5	18626.1	14.1204	515.72	10.8707	44.7466	55.7992	5.53794	16.856	124.162	8.77307	17.6419	12.3081	322.202	0	0.991153	0.859427	14.861	0.85005
11.24_706.4133n	706.413	724.447	1	11.2364	0.6808	0	0	0	11107	LA2657	LA1732	100 - 29.5 - 5.02 - 0.473 - 0.0199	4563.27	19.59	3540.06	3306.98	4213.58	3257.25	3923.58	2276.36	4824.03	3835.29	3675.52	4259.3	3662.78	7122.71	2576.19	2784.87	4247.11	1334.4	4087.07	2138.38	1.45407	123.501	2.46394e-05	0	6.10725	0.0102874	0.263107	0	0.000345293	0.590055	0.000791695	13.4971	0.414078	4.45495e-05	0	2.51867	0.226004
3.24_404.2054n	404.205	422.239	1	3.23852	0.366133	0	0	0	4043.8	LA1693	LA2657	100 - 21.5 - 3.3 - 0.35 - 0.0166	39183.9	25.12	66.4908	18.0311	17.3675	155.815	33.5383	13.9153	33.9071	9.25631	3.18438	2.54445	3.05213	6.19502	350.927	14.8834	37.3016	4715.4	26.0954	6.40135	43937.9	17114.3	41713.9	38024.1	43731.1	50582.3	16871.1	18648.9	26972.8	13952.1	24143.5	25686.4	8694.43	9189.77	13311.1	19405.3	12266.7
6.72_460.2673n	460.267	478.301	1	6.72258	0.280317	0	0	0	2536.93	LA1656	LA2560	100 - 26.4 - 4.39 - 0.512 - 0.0287	22121.2	12.91	14.0869	13.7711	0.994198	8.23035	9.97364	5.26204	14.9493	12.5102	4.84546	17.1087	6.89434	3.5077	16.5175	6.59679	1.54961	2989.74	2.69213	7.9853	705.093	1515.7	2837.8	850.608	6064.7	9239.41	298.265	1804.67	448.937	16562.4	594.71	2137.07	84.711	77.4151	90.4944	140.479	92.9863
9.14_678.3822n	678.382	696.416	1	9.14253	0.31465	0	0	0	2525.52	LA2963	LA1656	100 - 28.1 - 4.61 - 0.416 - 0.00148	6066.78	16.81	551.354	825.51	1337.69	744.781	872.757	625.934	471.993	1249.35	568.32	1414.52	606.133	1278.54	1036.99	672.814	321.007	228.525	276.769	607.936	202.719	393.785	286.861	773.463	236.886	185.631	404.657	890.472	260.369	221.221	302.764	1113.77	29.4975	24.0872	19.3999	20.4338	20.1568
5.58_446.2519n	446.252	464.286	1	5.57838	0.217417	0	0	0	2187.58	LA1656	LA2963	100 - 28.9 - 5.44 - 0.706 - 0.0541	15375.3	28.61	168.317	234.854	138.914	85.8845	37.9595	200.453	168.607	53.8152	112.048	224.277	56.3297	46.8919	148.401	137.271	93.0818	1328.13	81.9678	68.6976	294.859	491.423	1103.21	118.542	2962.01	3892.42	30.7086	296.501	45.3258	3822.56	45.8663	344.832	17.2705	13.4017	17.9736	34.0303	17.3646
7.57_664.3672n	664.367	682.401	1	7.56927	0.99545	0	0	0	2096.86	LA1282	LA1732	100 - 32.5 - 6.65 - 0.868 - 0.0749	38314.9	15.61	1442.94	3182.12	1356.94	1600.3	3849.08	3261.43	1506.82	3603.47	1423.62	4662.28	1553.04	2407.83	3861.94	4209.19	3645.44	2185.65	4229.09	2544.9	338.054	303.663	336.232	588.427	249.167	69.9274	267.712	1158.97	122.76	150.372	164.771	2972.33	4.26769	8.12562	3.84949	141.734	4.64734
8.56_678.3828n	678.383	696.417	1	8.56472	0.732283	0	0	0	2037	LA2560	LA1732	100 - 30.6 - 5.68 - 0.668 - 0.04 - 0.00052	8385.32	25.38	4259.66	3775.23	13074.9	4288.25	4821.07	20092.9	3981.14	9871.67	6054.12	6080.87	6077.61	5123.99	6508.6	10841.4	10528.3	6007.57	6599.56	4127.55	12.0794	135.019	13.2081	4.46765	19.3867	1.35518	4.48109	105.797	0.230835	3.44271	0	657.578	0	1.07455	0	37.6898	0
13.36_530.3455n	530.346	548.379	1	13.3589	0.2975	0	0	0	1719.34	LA2560	LA1656	100 - 26.4 - 4.21 - 0.411 - 0.00773	9199.07	25.4	15088.1	5317.78	9237.23	6818.33	14726.1	4006.88	10474.1	8013.99	10629.2	3768.51	10137.2	5625.89	4266.7	3834.7	4733.25	2452.23	5675.59	4160.26	26.0062	335.717	16.9089	41.0779	30.7629	3.60564	45.5884	48.568	38.8145	18.1209	57.3103	64.2585	93.3184	55.9138	32.776	33.0296	44.5461
5.45_636.3360n	636.336	654.37	1	5.44682	0.8467	0	0	0	1713.38	LA2963	LA1773	100 - 35.3 - 8.37 - 1.3 - 0.145	29991.8	13.42	7.63419	106.354	0	4.07533	35.3218	75.5865	19.0639	61.8523	18.6597	40.3955	19.4923	0	16.1605	21.9939	14.065	26.6463	3.092	23.0693	8771.93	4397.99	7322.14	4779.03	6141.75	3697.41	1323.76	2967.14	598.444	1846.42	424.834	3439.15	70.6122	68.4654	90.4719	116.17	74.8929
5.21_446.2520n	446.252	464.286	1	5.21222	0.377583	0	0	0	1506.48	LA2560	LA2963	100 - 19.9 - 2.79 - 0.22 - 0.000828	4469.76	19.68	2515.59	6324.79	4526.13	5285.06	2115.66	6051.31	2364.63	3110.47	2144.8	2689.86	2324.63	1730.03	2335.68	3394.96	6167.24	1573.43	4266.21	2375.55	4.80311	117.453	2.63749	2.3873	10.2822	7.87806	2.05515	12.5714	1.61358	1.38105	1.76025	26.1705	1.58702	1.52293	0.320831	15.6445	0.343464
10.72_502.3147n	502.315	520.349	1	10.7215	0.297483	0	0	0	1341.32	LA2719	LA1656	100 - 30.9 - 5.94 - 0.759 - 0.065	54726.3	14.35	2050.25	1649.44	788.923	1507.55	3623.33	1141.05	1036.63	1802.63	892.446	2856.27	911.541	1099.65	1401.07	1427.83	1293.47	1581.72	3537.07	1400.15	384.808	332.584	337.471	645.438	227.706	70.1981	700.361	640.556	622.972	212.361	926.906	976.36	876.398	663.945	653.693	828.662	688.076
13.10_530.3451n	530.345	548.379	1	13.0957	0.881017	0	0	0	1255.8	LA2560	LA1656	100 - 24.1 - 3.23 - 0.206	3978.08	26.78	6043.85	2415.33	4132.43	2943.41	6518.77	1814.7	4675.18	3734.91	4481.22	1531.24	4619.68	2186.43	1613.56	1541.48	2247.68	1225.27	2759.24	1818.76	15.2777	165.052	6.99617	17.9241	13.2897	3.75956	21.7742	28.6764	24.0011	16.5038	25.3907	40.6762	50.245	29.7707	18.6189	18.9653	23.7574
14.02_544.3593n	544.359	562.393	1	14.0226	0.245983	0	0	0	939.91	LA1367	LA0716	100 - 22.8 - 2.63	582.214	27.96	702.579	237.285	388.804	282.501	522.082	143.743	962.51	450.993	509.203	242.353	464.07	389.58	192.332	153.55	276.945	173.477	533.973	218.846	2.72048	44.8483	0.0147408	4.25904	1.94913	0.0110407	2.06675	2.12274	0.664442	0.901382	0.919346	1.22737	1.63561	0.564768	0.157767	0.77403	0.128159
11.73_516.3299n	516.33	534.364	1	11.7341	0.297483	0	0	0	881.925	LA1376	LA1656	100 - 24.5 - 3.62 - 0.271 - 0.00303	4664.38	21.61	3595.27	1373.47	4904.32	2321.13	1905.8	5089.16	2497.88	3752.62	2344.58	1657.86	2473.76	1152.38	1475.08	2304.2	2554.58	2152.65	2985.63	1529.27	29.878	114.677	15.3189	21.0448	15.4759	4.20365	41.1464	69.3042	47.6555	13.7569	46.3475	200.314	95.303	79.9176	54.0241	74.5943	61.3221
14.29_544.3603n	544.36	562.394	1	14.2857	0.268917	0	0	0	782.833	LA1367	LA0716	100 - 23.6 - 2.97 - 0.103	1023.67	27.19	1387.44	427.456	602.582	580.969	906.228	242.802	2037.15	833.086	865.68	468.362	856.897	664.586	346.766	283.509	506.295	264.858	916.326	350.177	3.52594	89.6321	0.775696	6.91462	2.90028	2.63539	1.3823	8.03996	0.844587	0.536365	0.252493	1.87458	3.48949	0.498277	0.535343	1.03633	1.57628
11.47_516.3296n	516.33	534.363	1	11.4652	0.617867	0	0	0	719.177	LA1376	LA1656	100 - 22.4 - 3 - 0.158	2070.53	15.19	1684.25	702.527	2031.65	1118.26	837.876	2243.3	1199.17	1637.23	922.169	718.911	1076.37	492.857	692.316	972.407	1205.55	995.977	1527.4	861.495	11.4463	47.7825	7.20099	2.34019	8.39601	0	8.30142	32.3212	6.15547	3.65813	5.72291	109.959	29.5258	25.6784	23.3866	31.8995	24.0637
4.60_432.2367n	432.237	450.271	1	4.6001	0.2689	0	0	0	694.293	LA2560	LA0716	100 - 26.6 - 4.89 - 0.586 - 0.0496	53199.3	14.62	43595.3	60672.1	55296.1	57357.3	43256.9	59018.1	31825.7	45362.1	51016.8	36876.7	51245.3	22916.1	62420.4	65716.1	56613.4	29124.9	39919.6	49172.1	142.712	967.06	146.422	274.98	189.02	193.038	56.5559	268.03	51.9	43.3871	74.1173	832.98	55.7166	37.5111	41.7805	227.945	49.3896
11.40_502.3144n	502.314	520.348	1	11.4023	0.280333	0	0	0	528.118	LA1941	LA1523	100 - 27 - 4.43 - 0.553 - 0.0175	4786.16	16.82	43.0016	7.99878	51.8504	35.6518	6.61307	86.0372	12.6659	13.2567	9.16404	9.67822	8.99905	13.9438	9.29988	13.7979	11.517	21.4447	6.62153	15.135	173.465	290.831	258.45	345.584	191.002	122.711	766.712	246.602	736.015	367.637	623.918	258.708	2743.35	3705.87	3762.04	3192.67	2833.82
12.40_516.3297n	516.33	534.364	1	12.3978	0.31465	0	0	0	479.813	LA1941	LA1656	100 - 24.9 - 3.53 - 0.277	3227.26	15.72	760.84	335.046	700.965	529.23	607.399	188.309	373.671	556.309	393.072	492.469	401.165	447.552	330.989	184.141	149.306	137.928	191.178	356.334	170.599	293.763	191.543	498.62	130.066	96.7538	1176.65	327.207	1083.3	412.314	1301.68	345.845	2411.87	2656.67	1676.43	1365.81	1555.16
5.43_446.2523n	446.252	492.317	1	5.42965	0.366167	0	0	0	455.456	LA2560	LA0716	100 - 20.9 - 2.96 - 0.259 - 0.00376	9117.5	15.88	5819.3	13027.1	9227.81	11789.1	4227.43	10614.4	5195.07	6524.6	4942.21	6201.24	5162.32	4205.04	5444.85	8375.97	12690.3	4332.61	9513.85	5898.75	141.651	625.431	820.093	88.2074	1939.72	2455.58	17.002	150.4	28.8627	1814	31.0885	286.544	6.31028	11.7741	14.1712	62.3093	11.5926
8.33_474.2830n	474.283	492.317	1	8.33017	0.314667	0	0	0	441.022	LA0716	LA2560	100 - 28.9 - 5.4 - 0.656 - 0.0692 - 0.000431	36355.9	11.99	88.4163	34.6543	37.1094	253.825	55.5698	25.0383	47.9639	57.8565	95.5977	125.315	68.9959	138.54	73.4818	39.5702	33.8332	406.435	96.7502	145.395	19761.7	16871.9	27332.3	15398.1	18766.1	10052.1	27420.8	13685.1	26612.7	27019.9	25375.4	19625.1	37944.7	33113.7	36292.5	29582.9	40529.7
4.42_432.2366n	432.237	450.27	1	4.41703	0.314683	0	0	0	428.862	LA2560	LA0716	100 - 25.1 - 4.56 - 0.56 - 0.041	37481.4	25.26	24814.1	49054.5	38264.1	38488.7	28415.3	45851.6	13692.7	28559.5	27075.5	18022.9	28418.2	11238.1	37891.6	45640.1	40324.6	13494.8	20094	23997.3	286.377	558.274	229.705	413.459	266.186	202.186	89.1893	401.123	105.951	59.4492	172.096	711.813	89.4465	65.4522	75.8711	139.12	86.217
6.99_460.2670n	460.267	478.301	1	6.98573	0.280333	0	0	0	376.747	LA1732	LA2560	100 - 20.8 - 2.7 - 0.16	4370.11	13.42	13.3624	22.6493	0.988904	11.4181	13.2945	7.88429	25.8634	16.4011	6.28475	33.5048	8.12082	9.99256	17.6571	7.20134	4.41085	727.756	5.90343	10.1106	499.094	1004.43	1217.78	673.31	1312.21	1847.2	269.183	1076.2	367.157	3617.03	432.828	992.885	136.967	133.556	174.372	190.268	159.088
10.44_502.3145n	502.314	520.348	1	10.4412	1.02978	0	0	0	367.691	LA2719	LA1656	100 - 27.9 - 4.8 - 0.546 - 0.0406	27119.6	18.18	2864.55	2718.81	1546.04	2664.1	2545.69	2638.69	1675.14	3371.95	1258.82	2740.67	1266.88	1283.49	1465.87	1907.34	1637.74	1675.53	3102.95	2192.01	541.51	438.249	713.971	664.997	471.165	130.667	943.17	743.133	938.449	424.979	1086.35	1484.33	896.064	951.591	606.777	731.198	752.69
6.46_460.2665n	460.266	478.3	1	6.45942	0.6007	0	0	0	294.424	LA1656	LA0716	100 - 21.8 - 2.64 - 0.216	6875.11	17.56	411.079	697.282	447.652	732.814	282.428	333.912	559.887	559.578	298.923	588.507	318.22	427.883	330.691	359.926	759.62	1272.15	938.314	438.112	198.27	472.045	792.554	262.732	1662.33	2739.72	87.375	557.821	120.812	5110.83	150.473	693.525	21.0669	21.3029	24.1239	33.442	19.3278
8.64_474.2826n	474.283	492.317	1	8.64482	0.31465	0	0	0	260.021	LA1941	LA2657	100 - 28.2 - 5.29 - 0.689 - 0.0642	10605.5	7.61	79.2297	89.0153	37.6837	158.288	32.4075	67.1826	30.2112	42.6102	44.3611	47.5029	33.5648	46.4734	40.6846	50.1281	29.5591	153.526	36.4235	52.1987	1410.01	4877.72	3703.9	4355.54	2265.54	888.761	8246.48	2789.45	8950.19	4968.87	8552.9	3229.18	9200.12	11101.1	10038.3	10087.4	9238.14
6.24_650.3518n	650.352	668.386	1	6.24202	0.74945	0	0	0	258.948	LA2963	LA1946	100 - 34 - 7.62 - 1.08 - 0.114 - 0.00103	23899.3	18.01	326.1	1606.08	31.6579	178.664	607.044	1508.06	543.792	1485.05	638.849	1122.58	672.33	274.622	217.236	613.245	658.065	226.497	427.907	742.897	5300.93	3250.74	4428.46	5213.07	3989.8	2607.73	3752.27	7655.78	1769.62	4176.86	1595.28	10267.2	104.855	86.2368	85.6653	129.537	87.2061
12.10_516.3295n	516.329	534.363	1	12.1003	0.297483	0	0	0	258.77	LA1941	LA1656	100 - 24.8 - 3.16 - 0.181	1537.18	17.68	284.848	146.136	283.533	202.847	239.315	87.5629	175.875	277.02	187.567	220.608	197.138	191.088	156.478	81.2602	58.7903	80.2812	88.8995	150.798	105.654	151.24	110.493	263.636	73.8706	50.3894	518.688	200.55	576.752	229.339	627.114	190.409	1219.18	1173.43	838.331	755.776	848.715
4.00_359.1139m/z		359.114	1	3.99938	0.663633	0	0	0	224.31	LA0716	LA2963	100 - 7.07 - 0.302	584.329	27.99	3.179	1.63587	6.57748	6.48008	1.45607	1.08951	3.81189	1.63741	5.11952	1.79929	2.84846	1.40251	62.3936	131.272	10.5022	154.662	12.2174	6.88806	64.2863	3.37479	4.59398	5.47906	30.4651	26.4727	177.51	19.9884	11.2809	20.0595	18.5497	34.2817	674.696	857.007	453.624	610.508	454.045
9.34_488.2990n	488.299	506.333	1	9.34277	0.31465	0	0	0	152.775	LA0716	LA2657	100 - 34.3 - 7.37 - 1.03 - 0.114 - 0.000752	36260.1	10.89	580.28	560.718	525.279	923.868	344.766	265.034	146.494	396.428	169.184	341.034	149.687	221.229	840.036	1098.88	371.566	566.996	318.369	424.315	9231.96	7656.22	14818.6	16906	8518.32	4184.01	49172.2	13830.3	43250.9	29803.9	50732.4	19038.9	39937.8	42217.5	34809.3	31878.4	34781.1
6.52_650.3516n	650.352	668.385	1	6.52233	0.3318	0	0	0	136.189	LA1356	LA1656	100 - 30.1 - 5.7 - 0.667 - 0.0577	3418.4	17.47	12.4529	40.0049	10.4438	19.8774	48.7962	26.5934	11.5801	51.4323	13.6567	109.507	12.3076	22.2852	123.511	52.8116	23.9379	27.1774	25.8754	30.6144	1185.35	2649.53	1692.95	5003.63	1174.17	621.439	2396.29	3744.58	1166.34	1521.23	1483.99	5179.83	51.8435	41.0787	34.1213	40.7479	32.1239
8.03_474.2832n	474.283	492.317	1	8.03268	1.24145	0	0	0	93.6861	LA0716	LA1773	100 - 29.9 - 5.99 - 0.829 - 0.0935	34435.1	12.62	488.148	939.593	41.3966	322.403	510.3	412.713	425.044	893.937	421.771	1159.58	427.303	466.519	160.475	236.215	152.755	709.525	316.384	629.997	9375.66	5760.64	12720.2	6022.92	10266.7	4967.58	14836.6	6541.93	20767.1	18813.9	12645.8	8791.04	26246.5	33240.4	37050.5	38176.1	35401.1
9.05_488.2990n	488.299	506.333	1	9.04528	0.8467	0	1.53211e-14	8.99789e-15	50.3285	LA0716	LA1656	100 - 27 - 4.45 - 0.509 - 0.0416	14386.3	12.8	3640.11	8109.6	486.161	1758.68	2898.21	5461.05	2563.33	6108.29	2813.92	5680.55	2489.23	1591.2	693.336	2277.01	1606.98	1236.53	2647.77	2975.1	2940.72	1747.07	4555.6	3454.4	2567.9	1379.26	14059.1	4046.27	15561.4	10226.8	13208.4	5077.48	13992.2	17867.8	14397	16295.6	13226.5
3.79_432.2012n	432.201	450.235	1	3.78772	0.2517	0	1.14242e-13	6.28891e-14	1765.07	LA1674	LA0716	100 - 17.2 - 2.22 - 0.132	867.295	33.06	1.75582	8.07176	7.80547	185.639	122.898	15.1184	0.655109	3.06554	1.68949	16.2919	3.39793	2.73588	2.02523	2.13526	2.90544	0	2.46496	1.74803	12.4075	1.4911	7.99051	4.2715	1481.65	2107.14	0.200297	2.15052	1.72074	0.131631	0.240063	0	0.426855	0.464901	0.9137	0.634182	0.508563
3.17_345.0966m/z		345.097	1	3.16985	0.463383	0	8.35443e-13	4.09602e-13	Infinity	LA1657	LA2963	100 - 11.9 - 0.692	268.923	34.41	4.46723	8.99788	48.7191	9.97238	1.22968	18.5972	22.4713	17.6801	14.3606	36.2528	17.0462	49.401	91.2606	169.289	118.042	142.914	132.965	48.3378	6.61868	12.1827	4.83239	8.57007	3.30711	3.03554	204.749	20.7989	24.8921	18.0571	31.5895	38.081	257.786	326.483	143.494	193.872	165.975
3.83_418.2208n	418.221	436.255	1	3.83347	0.480567	0	7.20631e-11	2.57372e-11	120.522	LA1809	LA1272	100 - 18.6 - 2.45 - 0.167 - 0.00195	30701.6	13.9	599.387	1598.81	1505.7	1620.47	820.727	2362.69	386.295	1194.34	725.265	1095.09	770.487	386.859	2567.57	985.303	1345.49	1160.13	486.9	1260.01	3068.17	1423.7	3856.22	3125.28	3629.04	2681.42	861.622	2026.77	1185.67	557.393	1481.74	3244.89	769.084	544.93	779.204	810.905	830.876
4.10_446.2155n	446.215	492.281	1	4.10237	0.314667	0	7.69852e-10	2.5543e-10	Infinity	LA1674	LA0716	100 - 17.2 - 1.83 - 0.092	367.501	65.95	2.15392	0.33666	0	10.7044	6.62422	0.155526	1.64614	0.625063	1.13282	0	1.44863	0	0.286289	0	0	0	0	0	3.58362	0	0	0	803.985	1263.52	0.527405	0.945213	0	0.195312	0	0.711064	0	0	0	0	0
[truncated: 178 more columns]
